# Supplementary material for: The right ventricular fibroblast secretome drives cardiomyocyte dedifferentiation
Source: PubMed Central journal article supplement (PMC6677314; doi:10.1371/journal.pone.0220573), 2019-08-02
Supplement: pone.0220573.s001.pdf [file pone.0220573.s001.pdf]

## Detailed Methods

The primer sequences are as follows:

Rat periostin Forward: 5'-AGGAGCCGTGTTTGAGACCAT-3'

Rat periostin Reverse: 5'-CGGTGAAAGTGGTTTGCTGTTT-3'

Bovine periostin Forward: 5'-ACTTCACACTCTTTGCTCCC-3'

Bovine periostin Reverse: 5'-CCATGATAGCCTCAGAACACTG-3'

18S Forward: 5'-GCCGCTAGAGGTGAAATTCTTG-3'

18S Reverse: 5'-CTTTCGCTCTGGTCCGTCTT-3'
