# Supplementary material for: The right ventricular fibroblast secretome drives cardiomyocyte dedifferentiation
Source: PubMed Central journal article supplement (PMC6677314; doi:10.1371/journal.pone.0220573), 2019-08-02

Supplemental Figure 8

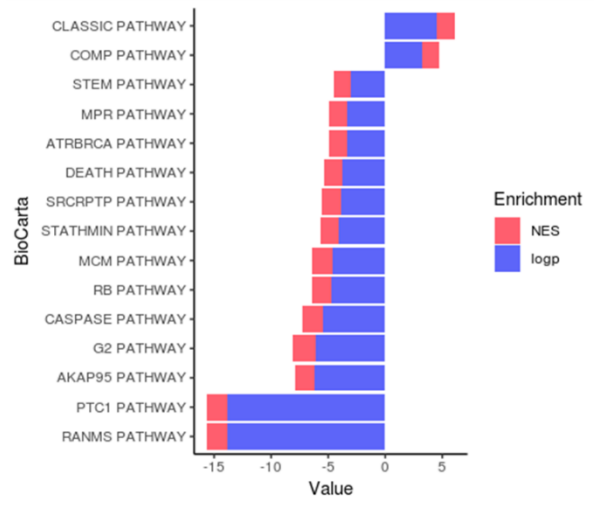

Supplement: pone.0220573.s011.pdf [file pone.0220573.s011.pdf]
